1 Original Article

2 **Surveillance of genetic diversity and evolution in locally transmitted SARS-**  
3 **CoV-2 in Pakistan during the first wave of the COVID-19 pandemic**

4 **Authors**

5  
6 Muhammad Shakeel<sup>¥1</sup>, Muhammad Irfan<sup>¥1</sup>, Zaibunnisa<sup>1</sup>, Muhammad Rashid<sup>2</sup>, Sabeeta Kanwal  
7 Ansari<sup>2</sup>, Ishtiaq Ahmad Khan<sup>1\*</sup>

8 **Affiliations**

9 1. Jamil-ur-Rahman Center for Genome Research, Dr. Panjwani Center for Molecular Medicine  
10 and Drug Research, ICCBS, University of Karachi, Karachi-75270, Pakistan

11 2. National Institute of Virology, Dr. Panjwani Center for Molecular Medicine and Drug  
12 Research, ICCBS, University of Karachi, Karachi-75270, Pakistan

13

14

15 **Correspondence**

16 \* for correspondence: IAK ([ishtiaqchemist@gmail.com](mailto:ishtiaqchemist@gmail.com))

17 <sup>¥</sup>These authors contributed equally to this study

## 18 **Abstract**

19 Surveillance of genetic diversity in the SARS-CoV-2 is extremely important to detect the  
20 emergence of more infectious and deadly strains of the virus. In this study, we monitored  
21 mutational events in the SARS-CoV-2 genome through whole genome sequencing. The samples  
22 (n=48) were collected from the hot spot regions of the metropolitan city Karachi, Pakistan during  
23 the four months (May 2020 to August 2020) of first wave of the COVID-19 pandemic. The data  
24 analysis highlighted 122 mutations, including 120 single nucleotide variations (SNV), and 2  
25 deletions. Among the 122 mutations, there were 71 singletons, and 51 recurrent mutations. A  
26 total of 16 mutations, including 5 nonsynonymous mutations, were detected in spike protein.  
27 Notably, the spike protein missense mutation D614G was observed in 31 genomes. The  
28 phylogenetic analysis revealed majority of the genomes (36) classified as B lineage, where 2  
29 genomes were from B.6 lineage, 5 genomes from B.1 ancestral lineage and remaining from B.1  
30 sub-lineages. It was noteworthy that three clusters of B.1 sub-lineages were observed, including  
31 B.1.36 lineage (10 genomes), B.1.160 lineage (11 genomes), and B.1.255 lineage (5 genomes),  
32 which represent independent events of SARS-CoV-2 transmission within the city. The sub-  
33 lineage B.1.36 had higher representation from the Asian countries and the UK, B.1.160  
34 correspond to the European countries with highest representation from the UK, Denmark, and  
35 lesser representation from India, Saudi Arabia, France and Switzerland, and the third sub-lineage  
36 (B.1.255) correspond to the USA. Collectively, our study provides meaningful insight into the  
37 evolution of SARS-CoV-2 lineages in spatio-temporal local transmission during the first wave of  
38 the pandemic.

## 39 **Keywords**

40 COVID-19, genetic evolution, pandemic, SARS-CoV-2 lineages, spatio-temporal surveillance

## 41 **1.0 Introduction**

42 The novel beta coronavirus, SARS-CoV-2 (Severe acute respiratory syndrome coronavirus 2)  
43 which causes respiratory illness named as Covid-19, was first emerged in Wuhan, China in  
44 December 2019 and recognized by World Health Organization (WHO) as pandemic in March  
45 2020 (Shereen, Khan, Kazmi, Bashir, and Siddique, 2020). According to John Hopkins  
46 University, there were more than 83 million confirmed cases and approximately 1.8 million  
47 deaths worldwide by the end of 2020. SARS-CoV-2 is a member of the family Coronaviridae,  
48 which comprises many virulent strains that infect humans and animals, including Middle East  
49 respiratory syndrome CoV (MERS-CoV) and SARS-CoV (V'kovski, et al., 2020). SARS-CoV-2  
50 is a positive-sense, single-stranded RNA virus with a genome size of approximately 29.8kb.  
51 Patients infected with SARS-CoV-2 demonstrate diverse clinical outcomes, ranging from  
52 asymptomatic to fatal (Adachi, Koma, Nomaguchi, and Adachi, 2020; Monchatre-Leroy et al.,  
53 2017). It contains four major structural proteins including spike (S) protein, membrane (M)  
54 protein, and envelope (E) protein, which are embedded in the viral surface envelope, while  
55 nucleocapsid (N) protein is in the ribonucleoprotein complex. Furthermore, the viral genome also  
56 encodes 16 nonstructural proteins (nsp1-16) and 6 accessory proteins (McBride, Van Zyl, and  
57 Fielding, 2014; Hassan, Choudhury, and Roy, 2020). The virus entry in the cell is facilitated by S  
58 protein. S1 subunit engages ACE-2 receptor for binding while S protein priming is carried out by  
59 binding to cellular serine protease TMPRSS2. This allows the fusion of viral and cellular  
60 membranes. This fusion is driven by the S2 subunit of S protein (Hoffmann, et al., 2020).  
61 Viruses rapidly evolve during pandemic due to accumulation of mutation. This contributes in  
62 viral adaptation, drug resistance and higher transmissibility of more virulent strains (Pachetti et  
63 al., 2020). Many descendants of the original Wuhan strain have already been evolved into  
64 distinct lineages with potential of vaccine escape. Despite very high mutation rate and rapid  
65 emergence of new strains very few mutations have been functionally characterized (Wang,  
66 Wang, and Zhuang 2020).  
67 A massive genome sequencing drive is under way globally, to document the genetic diversity of  
68 SARS-CoV-2. Several studies has reported large number of mutations in various genes,  
69 including S, M, E, N, ORF1ab, ORF3a, ORF6, ORF7, ORF8, and ORF10. It is noteworthy that  
70 several regions including nsp1, nsp2 nsp3, nsp12, and nsp15 of ORF1ab, S, as well as ORF8

71 genes have high mutation rate as compare to other genes (Rahimi, Mirzazadeh, and Tavakolpour,  
72 2020).

73 Genomic surveillance of a virus after it enters a new population is crucial for designing effective  
74 strategies for disease control and prevention (Ladner et al., 2019). The findings of such studies  
75 support contact tracing, social distancing, and travel restrictions to contain the spread of SARS-  
76 CoV-2. In a study conducted in Northern California from late January to mid-March 2020, using  
77 samples from 36 patients spanning nine counties and the Grand Princess cruise ship,  
78 phylogenetic analyses revealed the cryptic introduction of at least seven different SARS-CoV-2  
79 lineages into California (Deng *et al.*, 2020). Genetic surveillance of COVID-19 studies in  
80 Malaysia and other Asian countries highlighted the presence of B.6 lineage in the Asia Pacific  
81 region (representing 95% of the world cases of B.6 strains) (Chong *et al.*, 2020). The genomic  
82 based surveillance of COVID-19 cases in Beijing, China till May 2020 revealed transmission of  
83 SARS-CoV-2 in the city via three routes including Wuhan exposure group, foreigner imported  
84 cases, and locally transmitted cases (Du *et al.*, 2020).

85 Pakistan, shares borders with world's most densely populated nations with strong movement of  
86 people from and to the hotspots of COVID-19. The country confirmed its first COVID-19 patient  
87 on February 26, 2020, in southern city of Karachi. By the end of 2020, there are 479,715  
88 confirmed cases in Pakistan with more than 10,000 deaths. Government adopted progressive  
89 disease prevention initiatives to restrict social contacts, reduce the dissemination of viruses and  
90 avoid community-based transmissions. Pakistan witnessed peak in June and cases fell from  
91 thousands to a few hundred per day in September. Currently, Pakistan is experiencing second  
92 wave of infection with around 3000 new cases are diagnosed per day. World Health  
93 Organization appreciated overall strategy adopted by Pakistan to successfully contain the virus  
94 (WHO 2020 [https://www.who.int/news-room/feature-stories/detail/covid-19-in-pakistan-who-](https://www.who.int/news-room/feature-stories/detail/covid-19-in-pakistan-who-fighting-tirelessly-against-the-odds)  
95 [fighting-tirelessly-against-the-odds](https://www.who.int/news-room/feature-stories/detail/covid-19-in-pakistan-who-fighting-tirelessly-against-the-odds)).

96 The present study attempts to gain insight into the mutational spectrum of SARS-CoV-2 genome  
97 in the Pakistani. In this study, we comprehensively analyzed 48 SARS-CoV-2 genome sequences  
98 isolated from patients from different hotspots areas of Karachi. Spatiotemporal approach was  
99 adopted and samples were collected from May to August 2020. The focus of epidemiological  
100 analysis was to identify specific patterns of SARS-CoV-2 transmission through genomic analysis  
101 within local population before and during the containment stage of the COVID-19 and compare

102 findings with global data. Finding of this study will help to devise strategies for the future  
103 surveillance of potential transmission routes to contain future outbreaks.

## 104 **2.0 Material and Methods**

### 105 **2.1 Ethical Consideration, recruitment of patients, and samples collection**

106 The study was approved by the Research Ethics Committee of the International Center for  
107 Chemical and Biological Sciences, University of Karachi, and the study design adhered to the  
108 ethical considerations according to the Declaration of Helsinki (Helsinki, 2013). For current  
109 study, a total of 200 patients were recruited from different hotspot areas of Karachi during the  
110 first wave of COVID-19 from May to August 2020. For COVID-19 testing, nasopharyngeal  
111 swabs were collected in viral transport medium (VTM) according to the guidelines of the Center  
112 for Disease Control and Prevention (CDC, 2020). All the patients were tested positive for  
113 COVID-19 by real time PCR using SARS-CoV-2 specific primers and probes at the National  
114 Institute of Virology, ICCBS, University of Karachi. Total RNA was isolated from the VTM in a  
115 biosafety level-3 (BSL-3) laboratory using QIAamp viral RNA mini kit (Qiagen, Hilden,  
116 Germany) following the manufacturer's protocol. Concentration of the total RNA was evaluated  
117 with Qubit fluorometer using Qubit RNA HS assay kit (Thermo Fisher Scientific, MA, USA).

### 118 **2.2 Complementary DNA synthesis**

119 Double stranded complementary DNA (cDNA) was synthesized from the total RNA by using  
120 Maxima H Minus Double-Stranded cDNA Synthesis Kit (cat#2561, Thermo Fisher Scientific,  
121 MA, USA) according to the manufacturer's protocol. This involved synthesis of the first strand  
122 cDNA followed by the second strand cDNA. For first strand cDNA synthesis, the isolated total  
123 RNA and random hexamer primers were incubated at 65°C for 5 minutes followed by addition of  
124 4X First Strand Reaction Mix along with First Strand Enzyme Mix. The reaction mixture was  
125 incubated at 25°C for 10 minutes, 50°C for 30 minutes, followed by termination of the reaction  
126 at 85°C for 5 minutes. The second strand cDNA synthesis was performed by adding 5X Second  
127 Strand Reaction Mix and Second Strand Enzyme Mix to the first strand cDNA synthesis reaction  
128 mixture. Final volume was adjusted with nuclease free water, and the reaction mixture was  
129 incubated at 16°C for 60 minutes. The reaction was stopped by adding 0.5M EDTA. The double  
130 stranded cDNA was purified by using Agencourt AMPure XP beads (Beckman Coulter, CA,  
131 USA), and the concentration was evaluated using Qubit DNA HS assay kit (Thermo Fisher  
132 Scientific, MA, USA).

### 133 **2.3 DNA library preparation, and whole genome sequencing**

134 A total of 48 samples (male n=29, female n=19) were selected for SARS-CoV-2 whole genome  
135 sequencing. Paired-end libraries were constructed from the double stranded cDNA by using  
136 Illumina DNA Prep with Enrichment kit (Illumina Inc., San Diego, CA, USA) following the  
137 manufacturer's protocol. Briefly, the tagmentation of purified double stranded cDNA (50 ng)  
138 was performed by using bead linked transposomes followed by adapters ligation to the  
139 tagmented DNA. Unique indexes (IDT for Illumina DNA/RNA UD Indexes) were added to each  
140 tagmented DNA in limited cycles of RCR. The amplified tagmented DNA was purified using  
141 sample purification beads. Prior to the enrichment of SARS-CoV-2 genome, the libraries were  
142 pooled in 12 plex reactions (multiplexing of 12 samples). DNA fragments of the SARS CoV-2  
143 genome were hybridized with biotinylated respiratory virus oligos (Illumina Inc., San Diego,  
144 CA, USA). The DNA fragments hybridized with the custom oligos were captured using  
145 streptavidin magnetic beads. The enriched library was amplified followed by purification with  
146 Agencourt AMPure XP beads (Beckman Coulter, CA, USA). The concentration of the enriched  
147 libraries was determined using Qubit DNA HS assay kit (Thermo Fisher Scientific, MA, USA).  
148 The libraries were denatured with 0.2N NaOH followed by dilution to 12 pmole using the  
149 hybridization buffer (HT1). Paired-end sequencing (2x75 bases) using MiSeq reagent v2 kit was  
150 carried out on Illumina MiSeq (Illumina Inc., San Diego, CA, USA).

### 151 **2.4 Analysis of the sequencing data**

152 The raw data in the binary base call format (.bcl) was converted into fastq format on the MiSeq  
153 instrument. Quality of the DNA short reads was assessed using FastQC tool (Andrews, 2010).  
154 The short reads were aligned with the reference SARS-CoV-2 genome of the isolate from  
155 Wuhan, China (Wuhan-Hu-1 genome, Genbank accession NC\_045512) using the BWA-MEM  
156 algorithm (Li, 2013). The post alignment processing and variants calling was carried out by  
157 using the Samtools package (Dhandapany *et al.*, 2009). The samples with coverage  $\geq 88\%$  were  
158 processed for downstream analysis. The variants with quality score (QUAL)  $< 30$  were filtered  
159 out. The functional annotation of the variants was carried out by using ANNOVAR (Yang *et al.*,  
160 2015). For building the whole genome, the consensus sequences were generated from the binary  
161 alignment map (bam) files, as described previously (Sah *et al.*, 2020). For comparison and  
162 validation, DNA short reads were assembled through de novo assembly with Velvet 1.0.0

163 (Zerbino, 2010) tool using the default parameters. For inferring phylogenetic relationship, the  
164 assembled genomes were aligned with the Wuhan-Hu-1 genome using the Muscle multiple  
165 sequence alignment tool (Edgar, 2004). The phylogeny was constructed using the RAxML 8.2.12  
166 tool (Stamatakis, 2014) using maximum likelihood algorithm and 100 bootstrap replicates.



## 167 **3.0 Results and Discussion**

### 168 **3.1 Description of the Cohort**

169 We selected 48 COVID-19 patients from the public sector hospitals during the peak time of first  
170 wave of the pandemic (from 2<sup>nd</sup> May 2020 to 10<sup>th</sup> August 2020) in the metropolitan city of  
171 Karachi, Pakistan. The samples were included in the study after confirmed diagnosis with real  
172 time PCR test from the nasopharyngeal swab specimens. The cohort was comprised of 32 males  
173 and 16 females with a median age of 36 years (IQR 23-44 years). The samples were selected  
174 from the regions designated as COVID-19 hotspots by the local administrative authority. The  
175 disease symptoms were varying in the patients including mild symptoms of low grade fever and  
176 flu to moderate symptoms of fever, flue and difficulty in breathing.

### 177 **3.2 Genetic characteristics of the SARS-CoV-2**

178 To uncover the genomic characteristics and diversities of the virus responsible for the COVID-  
179 19 in Karachi, deep SARS-CoV-2 genome sequencing was employed using a custom oligos  
180 panel designed for the enrichment of respiratory viruses sequences. Through massively parallel  
181 sequencing, we obtained 27.112 million paired-end, good quality reads (on average 0.565 million  
182 reads per sample). After removing the samples in which viral genome coverage was below 85%,  
183 we obtained near complete viral genomes from 37 cases with average depth of coverage of  
184 1371X. After alignment of the short reads with the reference SARS-CoV-2 genome of Wuhan  
185 isolate (Wuhan-Hu-1, NC\_045512.2), the genetic variations were obtained employing the on-  
186 instrument default pipeline of BWA, Samtools, and GATK tools. After filtering out the low  
187 quality mutations (those with QUAL<30), there were cumulative 451 mutations at 122 genomic  
188 sites (including 120 single nucleotide variation (SNV) sites, and 2 deletion sites) (Supplementary  
189 Table S1). These variations include 71 singletons, and 51 recurrent mutations, which appeared  
190 more than once within the cohort (Fig.1). Great diversity in mutational sites among the genome  
191 assemblies was observed. There were, on average, 12.19 mutational events per genome (SD  
192  $\pm 3.57$ ) with a median of 12 mutations per genome (IQR 11-14). The genome-wide  
193 nonsynonymous/synonymous ratio was observed as 1.50, which is lower than the precedented  
194 nonsyn/syn ratio (1.88) in previous global scale study (van Dorp *et al.*, 2020). Further bifurcation  
195 indicated that the nonsyn/syn ratio was 1.48 at singleton sites whereas 1.52 at polymorphic sites.  
196 Furthermore, the nonsyn/syn ratio at homoplasic sites (those with recurrence in at least 3

197 genomes) was 1.17. These analyses indicated that the SARS-CoV-2 continued to acquire new  
198 nonsynonymous mutational sites within the studied cohort. Next we explored which region was  
199 prone to higher number of nonsynonymous mutations. The nonsyn/syn ratio across ORF1ab was  
200 1.75 where the ratio across rest of the genome was 1.23, indicating higher tendency of ORF1ab  
201 to acquire mutations at nonsynonymous sites (Fisher Exact  $P=0.23$ ,  $OR=1.57$ , 95%  $CI=0.671-$   
202  $3.031$ ).

### 203 **3.3 Mutational landscape**

204 Meta-analysis of large number of SARS-CoV-2 genomes across multiple countries has  
205 demonstrated that one SARS-CoV-2 genome differs from the Wuhan-Wu-I reference strain  
206 (NC\_045512.2) at maximum of 32 sites (van Dorp *et al.*, 2020). We constructed mutational  
207 landscape to decipher the genes which are more recurrently mutated than the others. This  
208 analysis highlighted that two genes i.e., Spike protein and non-structural protein 3 (nsp3)  
209 contained the highest number of recurrent mutations i.e., 35 mutational incidences each (Fig.2).  
210 Notably, the spike protein contained highest number of homoplasic sites (6 mutations) including  
211 two missense SNVs i.e., the D614G mutation observed in 32 samples (86.5% of the cohort), and  
212 Q677H mutation observed in 4 samples (10.8% of the cohort). The other highly recurrent  
213 variations included an upstream 5'-UTR mutation 241:C>T (observed in 33 samples), a silent  
214 mutation F924F in nsp3 (observed in 31 samples), a missense mutation in nsp12 P4715L  
215 (observed in 31 samples), a silent mutation L227L in nsp13 (observed in 12 samples), a silent  
216 mutation L280L in nsp14 (observed in 28 samples), silent mutations D294D and G880G in spike  
217 protein (observed in 12 and 13 samples respectively), a missense mutation Q57H in orf3a  
218 (observed in 31 samples), silent mutation Y71Y and missense mutation H125Y in membrane  
219 protein (observed in 27 and 4 samples respectively), a stop-gain mutation E39X in orf7b  
220 (observed in 4 samples), and missense mutations S194L and R209I in nucleocapsid protein  
221 (observed in 11 samples each). Comparison of the frequency of recurrent mutations in our cohort  
222 with the global recurrence showed that the missense mutation V2133A in nsp3 protein was  
223 observed in 5 samples of present study cohort, whereas, this mutations has been observed in 2  
224 SARS-CoV-2 genomes in Norway and one in Turkey.

### 225 **3.4 Spatio-temporal analysis on identified mutations**

226 In order to determine accumulation of mutations in SARS-CoV-2 with the passage of time, we  
227 determined mutation rate (total mutations/no. of cases) in each of the four months. This analysis  
228 showed that during the month of May 2020, 8.8 mutations per sample were observed, with  
229 singletons/recurrent mutations ratio of 2.5. The mutation rate in June 2020 was 10.05 mutations  
230 per genome, with singletons/recurrent mutations ratio of 2.65, in July 2020, the mutations per  
231 genome were 9.8 with singletons/recurrent mutations ratio of 1.28, and in August 2020, the  
232 mutations rate was 12.5 with singletons/recurrent mutations ratio of 0.23 (Fig.3A). Although,  
233 there was non-significant difference (one-way ANOVA  $P > 0.05$ ) in the mutation rate among the  
234 four months, yet there was significant increase in recurrent mutations during the month of July  
235 and August 2020 (Fig.3B). Next we investigated the mutational rate in genes of ORF1ab, spike,  
236 membrane, and nucleocapsid proteins separately (Fig.3C). This analysis indicated that the  
237 mutation rate in the ORF1ab during the months of May and June were comparable (5.06 and  
238 5.37 respectively), whereas it decreased in July (4.41) and increased in August (6.37). On the  
239 other hand, the mutation rate in the spike protein was 0.99 which increased to almost double in  
240 June (1.88), July (1.53), and August (2.09). The mutation rate in the membrane protein was  
241 comparable during the four months i.e., 0.78, 0.81, 0.80, 1.30 for May, June, July and August  
242 2020 respectively. Likewise, the mutation rate in the nucleocapsid protein was 1.10, 0.98, 0.91,  
243 1.20 during the months of May, June, July and August 2020 respectively.

### 244 **3.5 Phylogenetic relationship and lineages in SARS-CoV-2**

245 Given the samples were collected in four different locations of the city, we conducted a  
246 phylogenetic analysis to delineate clustering among the SARS-CoV-2 genomes. The  
247 phylogenetic analysis revealed that majority of the samples were descendants of B lineages  
248 (Fig.4) according to the taxonomic nomenclature proposed by Rambaut *et al.* 2020. Only one  
249 genome was found to be of A (Chinese) lineage, whereas, the remaining 36 genomes were of B  
250 lineages. Among the genomes of B lineages, one genome was of the parental B lineage and had  
251 highest similarity with the Wuhan-Wu-I genome, two genomes were of B.6 (Singapore lineage),  
252 whereas remaining 33 were either of B.1 lineage (3 genomes) or further descendants of B.1  
253 lineage. The descendants of B.1 comprised of three types of high prevalent lineages i.e., B.1.36  
254 (10 genomes), B.1.160 (11 genomes), and B.1.255 (5 genomes). These three types of B.1 sub-  
255 lineages seem to be spread in the city during independent transmission events. The B.1.36 is

256 global lineage with lots of representation of sequences from the India, Saudi Arabia, and UK  
257 (Ishtiaque *et al.*, 2020; Joshi *et al.*, 2020). The B.1.160 lineage is the most recently split from  
258 B.1.36 lineage and has mostly been reported from the European countries with major  
259 representation in the UK followed by Denmark, France and Switzerland (Rambaut *et al.*, 2020).  
260 The third major lineage in our genomes B.1.255 has major global representation with  
261 significantly higher representation in the USA. Notably, one genome was observed from B.1.184  
262 lineage, which has 100% representation in India (Andrew *et al.*, 2020). These findings were  
263 validated in the hierarchical clustering where three clusters of genomes were observed (Fig.5),  
264 where the founding lineages (B, B.1) appeared in the center of the principle component analysis  
265 (PCA) plot, whereas, the three sub-lineages clustered at the peripheries of the plot.

## 266 **Conclusion**

267 To the best of our knowledge this study presents first comprehensive report on the surveillance  
268 of genomic evolution in the SARS-CoV-2 transmitted locally in the metropolitan city of Karachi,  
269 Pakistan during the four months of first wave of the COVID-19 pandemic. The schematic  
270 analysis provided meaningful insight into the lineages being transmitted within the city. The  
271 higher prevalence of three types of B.1 sub-lineages highlighted that the virus most likely had  
272 entered into the region through the travellers from the Europe, USA, Saudi Arabia, and India.  
273 The findings of this study enabled to monitor whether a more deadly strain of SARS-CoV-2 is  
274 being spreading in the country or else. These preliminary analyses present mutational and  
275 lineages status of the genomes, further analyses are underway to find the impact of identified  
276 mutations on viral infectivity and fatality.

## 277 **Data Submission**

278 The whole genome sequence data reported in this paper have been deposited in the Genome  
279 Warehouse in National Genomics Data Center (Genome Warehouse, 2021), Beijing Institute of  
280 Genomics (China National Center for Bioinformatics), Chinese Academy of Sciences, under  
281 BioProject accession number PRJCA004109 (publicly accessible at <https://bigd.big.ac.cn/gwh>),  
282 and NCBI Genbank accession numbers MW447609-MW447645.

## 283 **Conflict of Interest**

284 The authors declare that there is no any conflict of interest.

## 285 Acknowledgement

286 This study was conducted through the funding provided by the host institution, Dr. Panjwani  
287 Center for Molecular Medicine and Drug Research (PCMD), ICCBS, University of Karachi,  
288 Pakistan.

289

## 290 References

291 Adachi, S., Koma, T., Nomaguchi, M., and Adachi, A. (2020). Commentary: Origin and  
292 evolution of pathogenic coronaviruses. *Frontiers in Immunology*, *11*, 811.

293 Andrew, B, and Áine, OT. (2020). SARS-CoV-2 lineages - Lineage B. Retrieved from  
294 [https://cov-lineages.org/lineages/lineage\\_B.html](https://cov-lineages.org/lineages/lineage_B.html)

295 Andrews, S. (2010). FastQC: a quality control tool for high throughput sequence data. Available  
296 at Babraham Bioinformatics website:  
297 <http://www.bioinformatics.bbsrc.ac.uk/projects/fastqc>.

298 CDC. (2020). Interim Guidelines for Collecting, Handling, and Testing Clinical Specimens for  
299 COVID-19. Retrieved from [https://www.cdc.gov/coronavirus/2019-ncov/lab/guidelines-](https://www.cdc.gov/coronavirus/2019-ncov/lab/guidelines-clinical-specimens.html)  
300 [clinical-specimens.html](https://www.cdc.gov/coronavirus/2019-ncov/lab/guidelines-clinical-specimens.html)

301 Chong, YM, Sam, I-C, Chong, J, Bador, MK, Ponnampalavanar, S, Omar, SFS, Kamarulzaman,  
302 A, Munusamy, V, Wong, CK, and Jamaluddin, FH. (2020). SARS-CoV-2 lineage B. 6  
303 was the major contributor to early pandemic transmission in Malaysia. *PLoS neglected*  
304 *tropical diseases*, *14*(11), e0008744.

305 Deng, X, Gu, W, Federman, S, du Plessis, L, Pybus, OG, Faria, NR, Wang, C, Yu, G, Bushnell,  
306 B, Pan, C-Y, *et al.* (2020). Genomic surveillance reveals multiple introductions of SARS-  
307 CoV-2 into Northern California. *Science*, *369*(6503), 582-587.  
308 doi:10.1126/science.abb9263

309 Dhandapany, PS, Sadayappan, S, Xue, Y, Powell, GT, Rani, DS, Nallari, P, Rai, TS, Khullar, M,  
310 Soares, P, and Bahl, A. (2009). A common MYBPC3 (cardiac myosin binding protein C)  
311 variant associated with cardiomyopathies in South Asia. *Nature genetics*, *41*(2), 187-191.

312 Du, P, Ding, N, Li, J, Zhang, F, Wang, Q, Chen, Z, Song, C, Han, K, Xie, W, Liu, J, *et al.*  
313 (2020). Genomic surveillance of COVID-19 cases in Beijing. *Nature Communications*,  
314 *11*(1), 5503. doi:10.1038/s41467-020-19345-0

315 Edgar, RC. (2004). MUSCLE: a multiple sequence alignment method with reduced time and  
316 space complexity. *BMC Bioinformatics*, *5*(1), 113. doi:10.1186/1471-2105-5-113

317 Genome Warehouse. (2021). Database Resources of the National Genomics Data Center, China  
318 National Center for Bioinformation in 2021. *Nucleic Acids Research*, *49*(D1), D18-D28.

319 Helsinki, Do. (2013). World Medical Association Declaration of Helsinki: ethical principles for  
320 medical research involving human subjects. *Jama*, *310*(20), 2191-2194.  
321 doi:10.1001/jama.2013.281053

322 Ishtiaque, A, Mohammad Uzzal, H, Arittra, B, Zeshan Mahmud, C, Tabassum Hossain, E,  
323 Golam, M, Keshob Chandra, D, Chaman Ara, K, and Salimullah. (2020). Comparative

- 324 Genomic Study for Revealing the Complete Scenario of COVID-19 Pandemic in  
325 Bangladesh. *medRxiv*, 2020. doi:<https://doi.org/10.1101/2020.11.27.20240002>
- 326 Joshi, M, Puvar, A, Kumar, D, Ansari, A, Pandya, M, Raval, J, Patel, Z, Trivdi, P, Gandhi, M,  
327 and Pandya, L. (2020). Genomic variations in SARS-CoV-2 genomes from Gujarat:  
328 Underlying role of variants in disease epidemiology. *bioRxiv*.
- 329 Li, H. (2013). Aligning sequence reads, clone sequences and assembly contigs with BWA-MEM.  
330 *arXiv preprint arXiv:1303.3997*.
- 331 Rambaut, A, Holmes, EC, O'Toole, Á, Hill, V, McCrone, JT, Ruis, C, du Plessis, L, and Pybus,  
332 OG. (2020). A dynamic nomenclature proposal for SARS-CoV-2 lineages to assist  
333 genomic epidemiology. *Nature Microbiology*, 5(11), 1403-1407. doi:10.1038/s41564-  
334 020-0770-5
- 335 Sah, R, Rodriguez-Morales, AJ, Jha, R, Chu, DKW, Gu, H, Peiris, M, Bastola, A, Lal, BK, Ojha,  
336 HC, Rabaan, AA, *et al.* (2020). Complete Genome Sequence of a 2019 Novel  
337 Coronavirus (SARS-CoV-2) Strain Isolated in Nepal. *Microbiology resource*  
338 *announcements*, 9(11), e00169-00120. doi:10.1128/mra.00169-20
- 339 Stamatakis, A. (2014). RAxML version 8: a tool for phylogenetic analysis and post-analysis of  
340 large phylogenies. *Bioinformatics*, 30(9), 1312-1313. doi:10.1093/bioinformatics/btu033
- 341 van Dorp, L, Richard, D, Tan, CCS, Shaw, LP, Acman, M, and Balloux, F. (2020). No evidence  
342 for increased transmissibility from recurrent mutations in SARS-CoV-2. *Nature*  
343 *Communications*, 2020(11), 5986. doi:10.1038/s41467-020-19818-2
- 344 Yang, H, and Wang, K. (2015). Genomic variant annotation and prioritization with ANNOVAR  
345 and wANNOVAR. *Nature Protocols*, 10(10), 1556-1566.
- 346 Zerbino, DR. (2010). Using the Velvet de novo assembler for short-read sequencing  
347 technologies. *Curr Protoc Bioinformatics*, Chapter 11, Unit 11.15.  
348 doi:10.1002/0471250953.bi1105s31

349

350

351  
352  
353  
354  
355  
356  
357  
358  
359  
360  
361  
362  
363

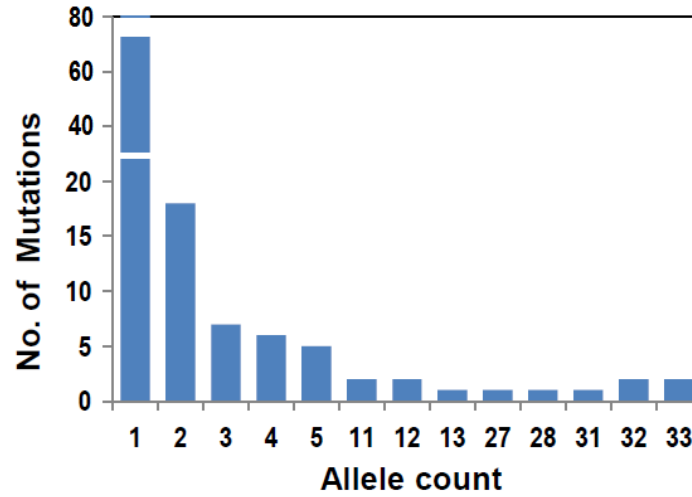

**Fig.1:** Allelic frequency spectrum of the mutations identified in the SARS-CoV-2 genomes of this study. The larger proportion of mutations comprised of singletons. Notably, highly recurrent mutations (including D614G substitution in the spike protein) were also observed in the analyzed genomes.



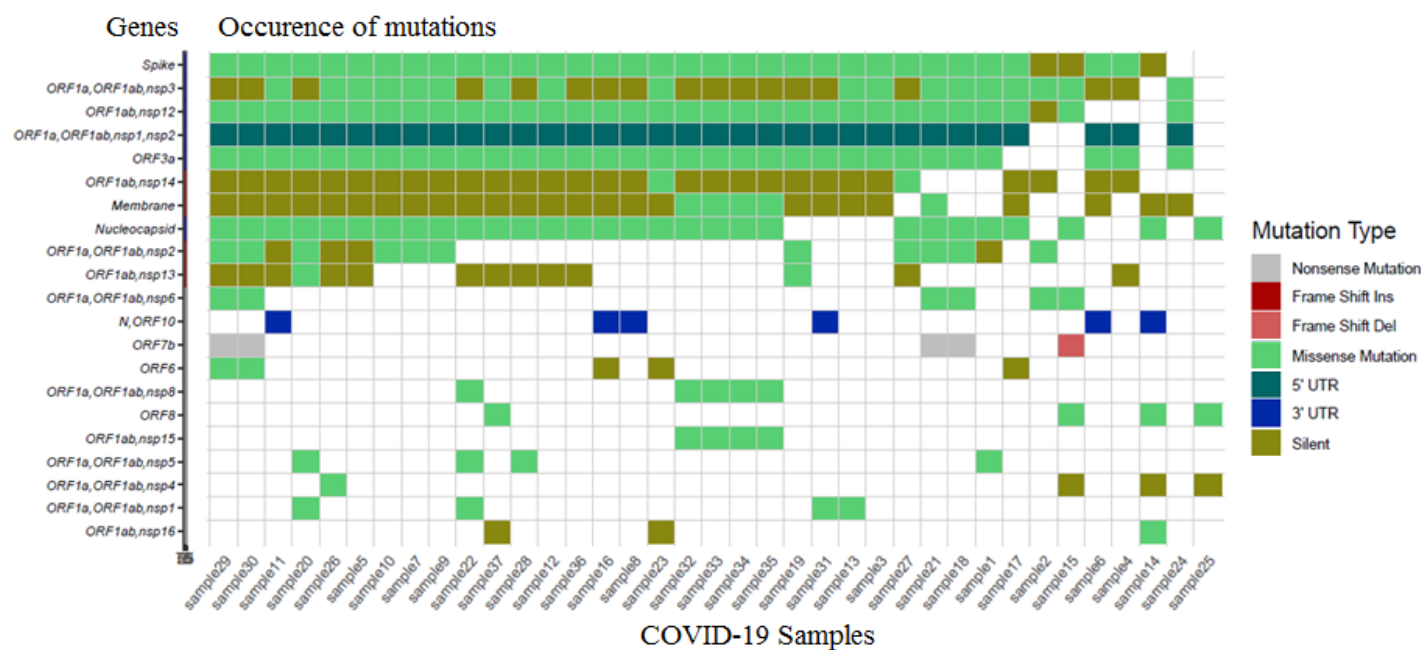

364

365 **Fig.2:** Mutational landscape, recurrence of mutations in genomes of SARS-CoV-2 isolated in  
366 Karachi (collected during May 2020 to August 2020)

367

368



369  
370  
371  
372  
373  
374  
375  
376  
377  
378  
379  
380  
381

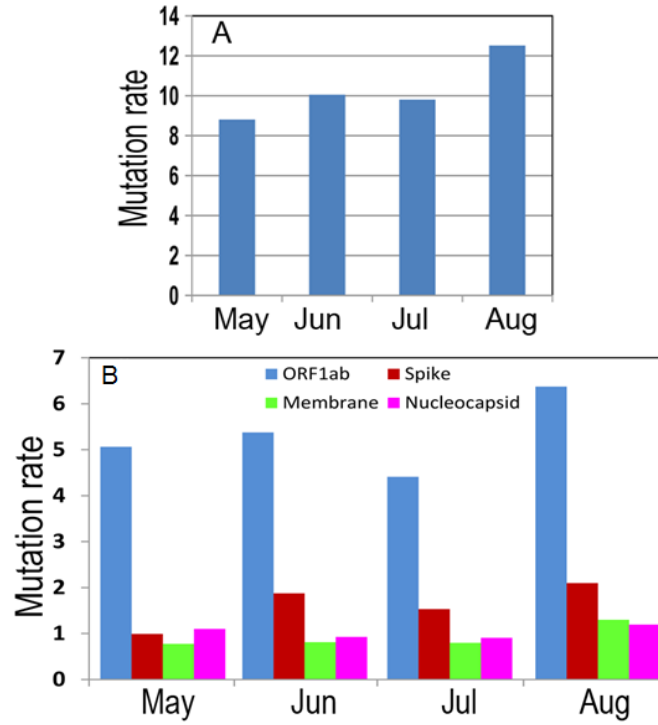

**Fig.3:** Mutational rate during the four months, May to Aug 2020.

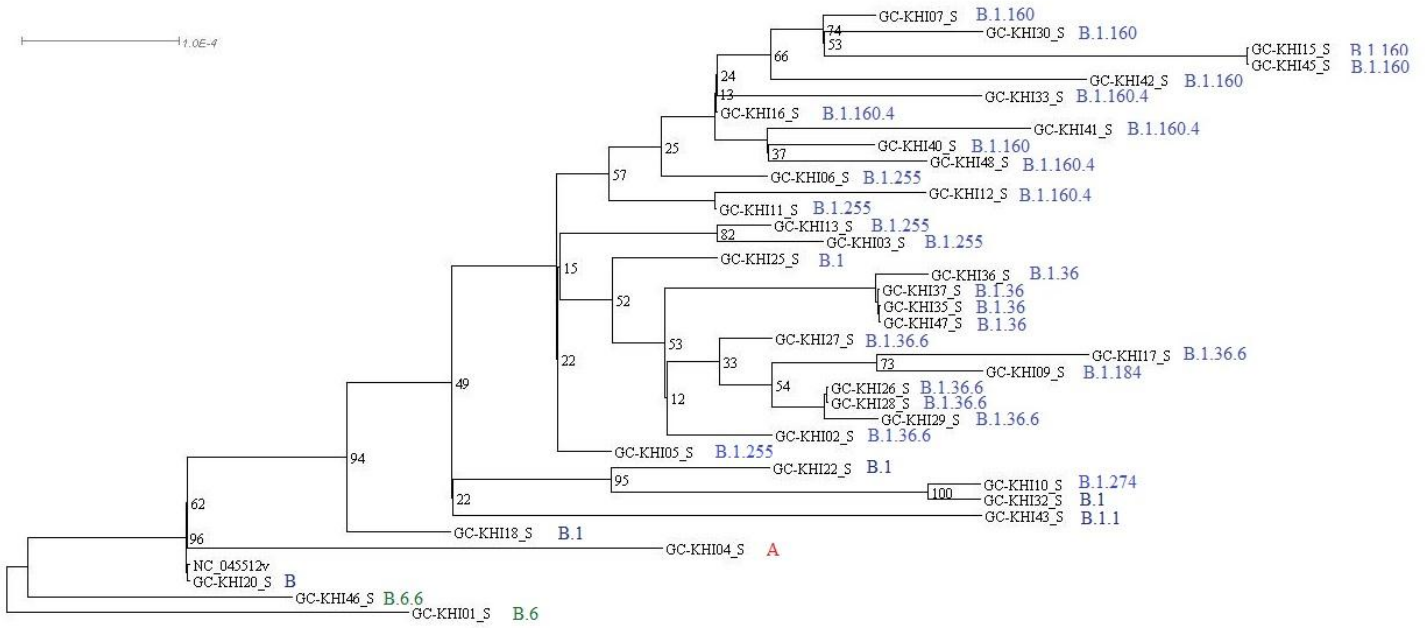

382

383 **Fig. 4:** Phylogenetic analysis of the SARS-CoV-2 genomes. The analysis indicated three types of  
384 lineages B.1.36, B.1.160, and B.1.255 in the analyzed cohort.

385

386

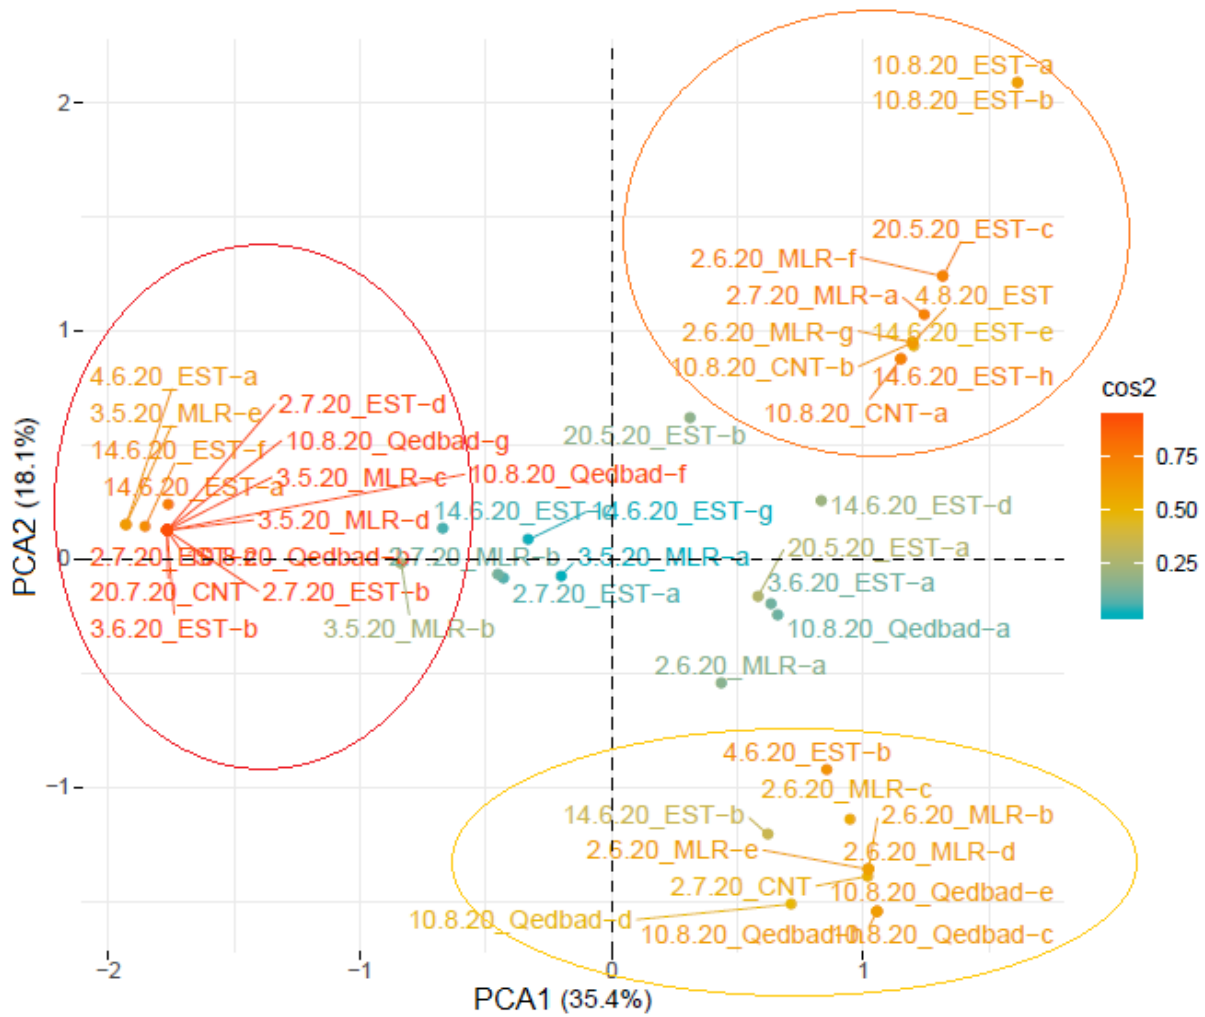

387

388

389 **Fig.5:** Hierarchical clustering of the SARS-CoV-2 genomes of this study using the mutational  
390 events in genomes. The genomes of B.1 parental lineages appeared in the center of the PCA plot,  
391 whereas, the three sub-lineages clustered at the peripheries.

392

393  
394

**Supplementary Table S1:** The recurrent and singleton mutations identified in the SARS-CoV-2 genomes of present study

| <b>S.No.</b> | <b>Mutation</b> | <b>Gene</b>            | <b>Mutation class</b> | <b>Mutation occurrence</b> |
|--------------|-----------------|------------------------|-----------------------|----------------------------|
| 1            | C241T           | ORF1a,ORF1ab,nsp1,nsp2 | upstream              | 33                         |
| 2            | P.Q63L          | ORF1a,ORF1ab,nsp1      | nonsynonymous_SNV     | 1                          |
| 3            | P.G82S          | ORF1a,ORF1ab,nsp1      | nonsynonymous_SNV     | 2                          |
| 4            | P.V116L         | ORF1a,ORF1ab,nsp1      | nonsynonymous_SNV     | 1                          |
| 5            | P.N188N         | ORF1a,ORF1ab,nsp2      | synonymous_SNV        | 1                          |
| 6            | P.K261N         | ORF1a,ORF1ab,nsp2      | nonsynonymous_SNV     | 2                          |
| 7            | P.F275L         | ORF1a,ORF1ab,nsp2      | nonsynonymous_SNV     | 3                          |
| 8            | P.R287G         | ORF1a,ORF1ab,nsp2      | nonsynonymous_SNV     | 2                          |
| 9            | P.Q362Q         | ORF1a,ORF1ab,nsp2      | synonymous_SNV        | 4                          |
| 10           | P.H374H         | ORF1a,ORF1ab,nsp2      | synonymous_SNV        | 1                          |
| 11           | P.S481F         | ORF1a,ORF1ab,nsp2      | nonsynonymous_SNV     | 1                          |
| 12           | P.T592I         | ORF1a,ORF1ab,nsp2      | nonsynonymous_SNV     | 1                          |
| 13           | P.V627F         | ORF1a,ORF1ab,nsp2      | nonsynonymous_SNV     | 2                          |
| 14           | P.Y717Y         | ORF1a,ORF1ab,nsp2      | synonymous_SNV        | 3                          |
| 15           | P.F924F         | ORF1a,ORF1ab,nsp3      | synonymous_SNV        | 32                         |
| 16           | P.G934C         | ORF1a,ORF1ab,nsp3      | nonsynonymous_SNV     | 1                          |
| 17           | P.T999I         | ORF1a,ORF1ab,nsp3      | nonsynonymous_SNV     | 1                          |
| 18           | P.L1175I        | ORF1a,ORF1ab,nsp3      | nonsynonymous_SNV     | 1                          |
| 19           | P.Y1354Y        | ORF1a,ORF1ab,nsp3      | synonymous_SNV        | 1                          |
| 20           | P.K1396R        | ORF1a,ORF1ab,nsp3      | nonsynonymous_SNV     | 1                          |
| 21           | P.A1485A        | ORF1a,ORF1ab,nsp3      | synonymous_SNV        | 1                          |
| 22           | P.T1754I        | ORF1a,ORF1ab,nsp3      | nonsynonymous_SNV     | 1                          |
| 23           | P.F1925F        | ORF1a,ORF1ab,nsp3      | synonymous_SNV        | 2                          |

|    |          |                   |                   |    |
|----|----------|-------------------|-------------------|----|
| 24 | P.D1926G | ORF1a,ORF1ab,nsp3 | nonsynonymous_SNV | 1  |
| 25 | P.S2015R | ORF1a,ORF1ab,nsp3 | nonsynonymous_SNV | 1  |
| 26 | P.T2016K | ORF1a,ORF1ab,nsp3 | nonsynonymous_SNV | 2  |
| 27 | P.V2133A | ORF1a,ORF1ab,nsp3 | nonsynonymous_SNV | 5  |
| 28 | P.T2408I | ORF1a,ORF1ab,nsp3 | nonsynonymous_SNV | 3  |
| 29 | P.K2497E | ORF1a,ORF1ab,nsp3 | nonsynonymous_SNV | 1  |
| 30 | P.L2564F | ORF1a,ORF1ab,nsp3 | nonsynonymous_SNV | 1  |
| 31 | P.A2618V | ORF1a,ORF1ab,nsp3 | nonsynonymous_SNV | 1  |
| 32 | P.Q2702H | ORF1a,ORF1ab,nsp3 | nonsynonymous_SNV | 3  |
| 33 | P.S2839S | ORF1a,ORF1ab,nsp4 | synonymous_SNV    | 1  |
| 34 | P.T2846I | ORF1a,ORF1ab,nsp4 | nonsynonymous_SNV | 1  |
| 35 | P.Y3098Y | ORF1a,ORF1ab,nsp4 | synonymous_SNV    | 1  |
| 36 | P.L3293F | ORF1a,ORF1ab,nsp5 | nonsynonymous_SNV | 1  |
| 37 | P.K3353R | ORF1a,ORF1ab,nsp5 | nonsynonymous_SNV | 1  |
| 38 | P.P3447S | ORF1a,ORF1ab,nsp5 | nonsynonymous_SNV | 1  |
| 39 | P.V3475F | ORF1a,ORF1ab,nsp5 | nonsynonymous_SNV | 1  |
| 40 | P.L3606F | ORF1a,ORF1ab,nsp6 | nonsynonymous_SNV | 4  |
| 41 | P.T3646A | ORF1a,ORF1ab,nsp6 | nonsynonymous_SNV | 2  |
| 42 | P.A3657T | ORF1a,ORF1ab,nsp6 | nonsynonymous_SNV | 2  |
| 43 | P.A3956V | ORF1a,ORF1ab,nsp8 | nonsynonymous_SNV | 4  |
| 44 | P.P4075S | ORF1a,ORF1ab,nsp8 | nonsynonymous_SNV | 1  |
| 45 | P.N4235N | ORF1a,ORF1ab,nsp9 | synonymous_SNV    | 1  |
| 46 | P.A4489V | ORF1ab,nsp12      | nonsynonymous_SNV | 1  |
| 47 | P.C4698C | ORF1ab,nsp12      | synonymous_SNV    | 1  |
| 48 | P.P4715L | ORF1ab,nsp12      | nonsynonymous_SNV | 32 |
| 49 | P.F4807F | ORF1ab,nsp12      | synonymous_SNV    | 2  |
| 50 | P.A4921V | ORF1ab,nsp12      | nonsynonymous_SNV | 2  |

|    |                |              |                   |    |
|----|----------------|--------------|-------------------|----|
| 51 | P.V4979L       | ORF1ab,nsp12 | nonsynonymous_SNV | 1  |
| 52 | P.H4991H       | ORF1ab,nsp12 | synonymous_SNV    | 1  |
| 53 | P.L5028L       | ORF1ab,nsp12 | synonymous_SNV    | 2  |
| 54 | P.L5167L       | ORF1ab,nsp12 | synonymous_SNV    | 1  |
| 55 | P.T127I        | ORF1ab,nsp13 | nonsynonymous_SNV | 2  |
| 56 | P.L227L        | ORF1ab,nsp13 | synonymous_SNV    | 12 |
| 57 | P.L256L        | ORF1ab,nsp13 | synonymous_SNV    | 1  |
| 58 | P.V495V        | ORF1ab,nsp13 | synonymous_SNV    | 1  |
| 59 | P.M49I         | ORF1ab,nsp14 | nonsynonymous_SNV | 1  |
| 60 | P.L157F        | ORF1ab,nsp14 | nonsynonymous_SNV | 1  |
| 61 | P.L280L        | ORF1ab,nsp14 | synonymous_SNV    | 28 |
| 62 | P.S454S        | ORF1ab,nsp14 | synonymous_SNV    | 1  |
| 63 | P.L495L        | ORF1ab,nsp14 | synonymous_SNV    | 1  |
| 64 | P.V148F        | ORF1ab,nsp15 | nonsynonymous_SNV | 4  |
| 65 | P.V104V        | ORF1ab,nsp16 | synonymous_SNV    | 1  |
| 66 | P.R216R        | ORF1ab,nsp16 | synonymous_SNV    | 1  |
| 67 | P.M260I        | ORF1ab,nsp16 | nonsynonymous_SNV | 1  |
| 68 | P.D80D         | Spike        | synonymous_SNV    | 1  |
| 69 | P.D294D        | Spike        | synonymous_SNV    | 12 |
| 70 | P.T302T        | Spike        | synonymous_SNV    | 1  |
| 71 | P.S305S        | Spike        | synonymous_SNV    | 5  |
| 72 | <b>P.D614G</b> | Spike        | nonsynonymous_SNV | 33 |
| 73 | P.D663D        | Spike        | synonymous_SNV    | 1  |
| 74 | P.Q677H        | Spike        | nonsynonymous_SNV | 4  |
| 75 | P.Y789Y        | Spike        | synonymous_SNV    | 2  |
| 76 | P.G880G        | Spike        | synonymous_SNV    | 13 |
| 77 | P.T887T        | Spike        | synonymous_SNV    | 1  |

|     |          |              |                     |    |
|-----|----------|--------------|---------------------|----|
| 78  | P.I1018I | Spike        | synonymous_SNV      | 2  |
| 79  | P.F1148F | Spike        | synonymous_SNV      | 5  |
| 80  | P.D1153G | Spike        | nonsynonymous_SNV   | 1  |
| 81  | P.P1162S | Spike        | nonsynonymous_SNV   | 2  |
| 82  | P.D1260D | Spike        | synonymous_SNV      | 1  |
| 83  | P.V1264L | Spike        | nonsynonymous_SNV   | 3  |
| 84  | P.I20V   | ORF3a        | nonsynonymous_SNV   | 1  |
| 85  | P.K21N   | ORF3a        | nonsynonymous_SNV   | 1  |
| 86  | P.Q57H   | ORF3a        | nonsynonymous_SNV   | 31 |
| 87  | P.H78H   | ORF3a        | synonymous_SNV      | 1  |
| 88  | P.T223I  | ORF3a        | nonsynonymous_SNV   | 1  |
| 89  | P.S4S    | Membrane     | synonymous_SNV      | 5  |
| 90  | P.L56L   | Membrane     | synonymous_SNV      | 1  |
| 91  | P.Y71Y   | Membrane     | synonymous_SNV      | 27 |
| 92  | P.H125Y  | Membrane     | nonsynonymous_SNV   | 4  |
| 93  | P.T130T  | Membrane     | synonymous_SNV      | 1  |
| 94  | P.T175M  | Membrane     | nonsynonymous_SNV   | 1  |
| 95  | P.I32I   | ORF6         | synonymous_SNV      | 1  |
| 96  | P.L44V   | ORF6         | nonsynonymous_SNV   | 2  |
| 97  | P.D61D   | ORF6         | synonymous_SNV      | 2  |
| 98  | P.F13fs  | ORF7b        | frameshift_deletion | 1  |
| 99  | P.L25F   | ORF7b        | nonsynonymous_SNV   | 1  |
| 100 | P.E39X   | ORF7b        | stopgain            | 5  |
| 101 | P.W45L   | ORF8         | nonsynonymous_SNV   | 1  |
| 102 | P.L84S   | ORF8         | nonsynonymous_SNV   | 1  |
| 103 | P.Q91L   | ORF8         | nonsynonymous_SNV   | 1  |
| 104 | P.P13L   | Nucleocapsid | nonsynonymous_SNV   | 1  |

|     |                |              |                   |    |
|-----|----------------|--------------|-------------------|----|
| 105 | P.R40L         | Nucleocapsid | nonsynonymous_SNV | 2  |
| 106 | P.Y111Y        | Nucleocapsid | synonymous_SNV    | 1  |
| 107 | P.S194L        | Nucleocapsid | nonsynonymous_SNV | 11 |
| 108 | P.S202N        | Nucleocapsid | nonsynonymous_SNV | 1  |
| 109 | P.R203K        | Nucleocapsid | nonsynonymous_SNV | 1  |
| 110 | P.R203R        | Nucleocapsid | synonymous_SNV    | 1  |
| 111 | P.G204R        | Nucleocapsid | nonsynonymous_SNV | 1  |
| 112 | P.R209I        | Nucleocapsid | nonsynonymous_SNV | 11 |
| 113 | P.F314F        | Nucleocapsid | synonymous_SNV    | 3  |
| 114 | P.S327L        | Nucleocapsid | nonsynonymous_SNV | 1  |
| 115 | P.K375K        | Nucleocapsid | synonymous_SNV    | 1  |
| 116 | P.T379I        | Nucleocapsid | nonsynonymous_SNV | 1  |
| 117 | P.D402Y        | Nucleocapsid | nonsynonymous_SNV | 1  |
| 118 | P.Y14C         | ORF10        | nonsynonymous_SNV | 1  |
| 119 | G29742A        | N,ORF10      | downstream        | 1  |
| 120 | GAGTGTAC29755G | N,ORF10      | downstream        | 1  |
| 121 | C29838T        | N,ORF10      | downstream        | 1  |
| 122 | C29870A        | N,ORF10      | downstream        | 3  |

395

396
